# Supplementary material for: Phage Morphology Recapitulates Phylogeny: The Comparative Genomics of a New Group of Myoviruses
Source: PubMed Central journal article supplement (PMC3391216; doi:10.1371/journal.pone.0040102), 2012-07-06
Supplement: pone.0040102.s001.pdf [file pone.0040102.s001.pdf]

**Table S1.** *Aeromonas* phage 56 ORFs with identifiable homologs/protein functions.

| ORF | Strand | Start | End   | nt length | aa length | E-value | Homolog(s)/Function <sup>a</sup>                                                                          |
|-----|--------|-------|-------|-----------|-----------|---------|-----------------------------------------------------------------------------------------------------------|
| 4   | -      | 689   | 1225  | 537       | 178       | 8e-24   | gp19 [ <i>Salmonella</i> phage SE1]; putative lysozyme [ϕPLPE]; cd00737 endolysin                         |
| 8   | -      | 2258  | 3043  | 786       | 261       | 1e-6    | structural protein gp26 [ϕPLPE]                                                                           |
| 9   | -      | 3036  | 3353  | 318       | 105       | 7e-25   | gp58 [ <i>Klebsiella</i> phage phiKO2]; P/BCHP                                                            |
| 11  | -      | 3640  | 4182  | 543       | 180       | 2e-8    | Dam methylase [ <i>Yersinia</i> phage PY100]; pfam05869                                                   |
| 16  | -      | 5026  | 5508  | 483       | 160       | 4e-16   | single-strand DNA binding protein [ <i>Yersinia</i> phage PY100]; cd04496                                 |
| 17  | -      | 5508  | 6191  | 684       | 227       | 9e-54   | exonuclease [Enterobacteria phage VT2phi_272]; cl09232 YqaJ viral recombinase                             |
| 18  | -      | 6188  | 7066  | 879       | 292       | 3e-103  | RecT protein [Enterobacteria phage VT2phi_272]; pfam03837                                                 |
| 23  | +      | 8378  | 8734  | 357       | 118       | 4e-16   | gp07412 [ <i>Pseudomonas syringae</i> pv. <i>glycinea</i> str. B076]                                      |
| 24  | +      | 8731  | 9483  | 753       | 250       | 1e-13   | DnaA [ <i>Lactobacillus</i> phage Lv-1]; many DNA replication; pfam09524 PCHP                             |
| 25  | +      | 9473  | 10057 | 585       | 194       | 2e-56   | gp0037 [ <i>Thalassomonas</i> phage BA3]                                                                  |
| 30  | +      | 11506 | 11871 | 366       | 121       | 1e-17   | Nin B [Enterobacteria phage HK022]; pfam05772                                                             |
| 33  | +      | 12474 | 12725 | 252       | 83        | 1e-8    | gp58 [ <i>Acinetobacter</i> phage AB1]                                                                    |
| 37  | +      | 13421 | 13792 | 372       | 123       | 7e-9    | gp4530 [ <i>Desulfatibacillum alkenivorans</i> AK-01]                                                     |
| 38  | +      | 13789 | 14505 | 717       | 238       | 3e-60   | Ant [ <i>Cronobacter</i> phage ENT47670]; pfam03374                                                       |
| 39  | +      | 14505 | 16097 | 1593      | 530       | 2e-15   | gp0002 [ <i>Thalassomonas</i> phage BA3]; putative methylase [ <i>Methyloversatilis universalis</i> FAM5] |
| 40  | +      | 16090 | 16701 | 612       | 203       | 6e-42   | NinG [ <i>Pseudomonas</i> phage PAJU2]; pfam05766                                                         |
| 43  | +      | 17375 | 17650 | 276       | 91        | 4e-15   | gp04 [ <i>Cronobacter</i> phage ES2]                                                                      |
| 47  | +      | 18566 | 19156 | 591       | 196       | 1e-58   | TerS [Enterobacteria phage phiV10]                                                                        |
| 48  | +      | 19140 | 20606 | 1467      | 488       | 6e-61   | TerL [ <i>Listeria</i> phage B054]                                                                        |
| 49  | +      | 20786 | 21364 | 579       | 192       | 5e-37   | gp04 [Enterobacteria phage K1ind3]; P/BCHP                                                                |
| 50  | +      | 21374 | 22924 | 1551      | 516       | 6e-111  | gp30 [ <i>Acinetobacter</i> phage AB1]; gp19 putative portal protein [ϕPLPE]                              |
| 51  | +      | 22924 | 23700 | 777       | 258       | 3e-53   | putative head protein [ <i>Xanthomonas</i> phage OP2]; many prophage heads                                |
| 55  | -      | 24860 | 25123 | 264       | 87        | 4e-15   | gp2072 [ <i>Vibrio cholerae</i> NCTC 8457]; BCHP                                                          |
| 59  | +      | 28654 | 28998 | 345       | 114       | 1e-6    | gp13 [ <i>Acinetobacter</i> phage AB1]; P/BCHP                                                            |
| 60  | +      | 29002 | 29397 | 396       | 131       | 2e-26   | gp6 [ <i>Xanthomonas</i> phage OP2]; P/BCHP                                                               |
| 62  | +      | 29574 | 30146 | 573       | 190       | 1e-7    | gp20 [ <i>Burkholderia</i> phage BcepB1A]; P/BCHP                                                         |
| 63  | +      | 30150 | 30524 | 375       | 124       | 5e-21   | gp4 [ <i>Xanthomonas</i> phage OP2]; P/BCHP                                                               |
| 64  | +      | 30521 | 31039 | 519       | 172       | 2e-6    | gp3 [ <i>Xanthomonas</i> phage OP2]; P/BCHP                                                               |
| 65  | +      | 31050 | 32528 | 1479      | 492       | 2e-94   | gp2 [ <i>Xanthomonas</i> phage OP2]; P/BCHP                                                               |
| 66  | +      | 32541 | 32978 | 438       | 145       | 4e-22   | gp1 [ <i>Xanthomonas</i> phage OP2]; P/BCHP                                                               |
| 67  | +      | 33059 | 33448 | 390       | 129       | 4e-6    | gp01 [ <i>Acinetobacter</i> phage AB1]                                                                    |
| 68  | +      | 33484 | 33660 | 177       | 58        | 2e-8    | gp15' E' [ <i>Burkholderia</i> phage BcepB1A]                                                             |

|    |   |       |       |      |     |       |                                                                                                                   |
|----|---|-------|-------|------|-----|-------|-------------------------------------------------------------------------------------------------------------------|
| 69 | + | 33669 | 35357 | 1689 | 562 | 2e-21 | gp84 [ <i>Acinetobacter</i> phage AB1]; gp55 putative tail-fiber/lysozyme protein [ $\phi$ PLPE]; PHA02564 virion |
| 73 | + | 35948 | 36592 | 645  | 214 | 6e-14 | gp83 [ <i>Acinetobacter</i> phage AB1]; P/BCHP                                                                    |
| 74 | + | 36600 | 36899 | 300  | 99  | 2e-8  | gp12 [ <i>Burkholderia</i> phage BcepB1A]; P/BCHP                                                                 |
| 75 | + | 36914 | 37756 | 843  | 280 | 3e-20 | gp82 [ <i>Acinetobacter</i> phage AB1]; P/BCHP                                                                    |
| 76 | + | 37758 | 38390 | 633  | 210 | 6e-25 | baseplate assembly protein [ <i>Burkholderia</i> phage BcepNY3]                                                   |
| 77 | + | 38390 | 38734 | 345  | 114 | 1e-18 | gp80 [ <i>Acinetobacter</i> phage AB1]; P/BCHP                                                                    |
| 78 | + | 38727 | 39308 | 582  | 193 | 8e-36 | gp04 [ <i>Enterobacteria</i> phage K1ind3]; P/BCHP                                                                |
| 79 | + | 39353 | 40567 | 1215 | 404 | 4e-66 | gp30 [ <i>Xanthomonas</i> phage OP2] ; gp61 putative baseplate protein [ $\phi$ PLPE]                             |
| 80 | + | 40564 | 41202 | 639  | 212 | 2e-27 | gp29 [ <i>Xanthomonas</i> phage OP2]; P/BCHP                                                                      |
| 81 | + | 41223 | 41945 | 723  | 240 | 3e-10 | tail fiber protein [ <i>Burkholderia</i> phage BcepNY3]                                                           |
| 82 | + | 41972 | 42829 | 858  | 285 | 4e-40 | tail fiber [ <i>Enterobacteria</i> phage HK97]                                                                    |
| 83 | + | 42826 | 43434 | 609  | 202 | 9e-27 | putative fiber assembly protein [ <i>Enterobacteria</i> phage $\lambda$ ]; pfam02413 phage tail-fibers            |

<sup>a</sup> Generally listed are the closest phage (if any) homologs of identifiable function, followed by identifiable bacterial homologs, and then phage/bacterial hypothetical proteins (if no function could be deduced) from BLASTp searches against the nr (or phage restricted) database using an *E*-value cutoff of  $<10^{-4}$ . Also included are additional hits/homologs of interest and hits to the Conserved Domain Database (CDD) with their cd/pfam/cl/PHA identifiers. (P/B)CHP = (phage/bacteria) conserved hypothetical protein.
