# Supplementary material for: Phage Morphology Recapitulates Phylogeny: The Comparative Genomics of a New Group of Myoviruses
Source: PubMed Central journal article supplement (PMC3391216; doi:10.1371/journal.pone.0040102), 2012-07-06
Supplement: pone.0040102.s002.pdf [file pone.0040102.s002.pdf]

**Table S2.** *Bdellovibrio* phage  $\phi$ 1422 ORFs with identifiable homologs/protein functions.

| ORF | Strand | Start | End   | nt length | aa length | E-value | Homolog(s)/Function <sup>a</sup>                                                                                    |
|-----|--------|-------|-------|-----------|-----------|---------|---------------------------------------------------------------------------------------------------------------------|
| 1   | +      | 1     | 828   | 828       | 275       | 3e-46   | gp39 [ <i>Bdellovibrio</i> phage $\phi$ 1402]                                                                       |
| 2   | -      | 803   | 2251  | 1449      | 482       | 7e-56   | putative helicase [Enterobacteria phage Eco1230-10]; COG1061 helicase                                               |
| 4   | -      | 2390  | 2896  | 507       | 168       | 6e-8    | gp01178 [ <i>Bacteroides caccae</i> ATCC 43185]                                                                     |
| 6   | -      | 3133  | 3777  | 645       | 214       | 1e-8    | DEAD/DEAH box helicase domain-containing protein [ <i>Desulfococcus oleovorans</i> Hxd3]; cd05782 DEDDy exonuclease |
| 10  | -      | 5105  | 6046  | 942       | 313       | 2e-29   | gp14 [ <i>Bacillus</i> phage BCJA1c]                                                                                |
| 13  | +      | 6766  | 7680  | 915       | 304       | 6e-12   | gp47 [ <i>Listeria</i> phage A118]; cl09232 YqaJ viral recombinase                                                  |
| 18  | +      | 8699  | 9088  | 390       | 129       | 6e-6    | gp51 [ <i>Staphylococcus warneri</i> L37603]                                                                        |
| 20  | +      | 9508  | 10944 | 1437      | 478       | 3e-20   | PcrA helicase [ <i>Bacillus</i> phage 0305 $\phi$ 8-36]; COG0210 UvrD helicase                                      |
| 22  | +      | 11175 | 11366 | 192       | 63        | 3e-6    | SecC motif-containing protein [ <i>Methylobacterium radiotolerans</i> JCM 2831]                                     |
| 23  | +      | 11480 | 13996 | 2517      | 838       | 2e-26   | putative primase [ <i>Stenotrophomonas</i> phage S1]; DNA primase traC                                              |
| 42  | -      | 20579 | 21451 | 873       | 290       | 2e-12   | ParB-like nuclease [ <i>Riemerella</i> phage RAP44]                                                                 |
| 44  | +      | 21819 | 23045 | 1227      | 408       | 7e-98   | large terminase subunit [ <i>Salmonella</i> phage E1]                                                               |
| 45  | +      | 23038 | 24474 | 1437      | 478       | 3e-21   | gp19 putative portal protein [ $\phi$ PLPE]                                                                         |
| 46  | +      | 24471 | 24800 | 330       | 109       | 2e-6    | $\sigma^{54}$ dependent transcrip. regulator [ <i>Shewanella</i> sp. W3-18-1]; pfam02954 Fis regulator              |
| 47  | +      | 24797 | 25753 | 957       | 318       | 2e-15   | putative head protein [ <i>Burkholderia</i> phage Bups $\phi$ 1]; gp25 putative head protein [ $\phi$ PLPE]         |
| 50  | +      | 27322 | 28353 | 1032      | 343       | 4e-6    | gp35 [Aa $\phi$ 23]                                                                                                 |
| 51  | +      | 28422 | 28859 | 438       | 145       | 1e-5    | putative bacteriophage protein [ <i>Escherichia coli</i> F11]                                                       |
| 55  | +      | 30484 | 31899 | 1416      | 471       | 2e-17   | gp39 [Aa $\phi$ 23]                                                                                                 |
| 62  | +      | 35279 | 36148 | 870       | 289       | 6e-17   | gp45 [Aa $\phi$ 23]                                                                                                 |
| 63  | +      | 36141 | 36869 | 729       | 242       | 4e-16   | gp3.3 [ <i>Burkholderia</i> phage Bups $\phi$ 1]; gp59 putative baseplate protein [ $\phi$ PLPE]                    |
| 64  | +      | 36866 | 37225 | 360       | 119       | 2e-13   | gp47 [Aa $\phi$ 23]                                                                                                 |
| 65  | +      | 37234 | 38658 | 1425      | 474       | 2e-23   | gp2213 [ <i>Aggregatibacter</i> phage S1249]; gp61 putative baseplate protein [ $\phi$ PLPE]                        |
| 66  | +      | 38658 | 39359 | 702       | 233       | 4e-14   | gp2212 [ <i>Aggregatibacter</i> phage S1249]                                                                        |
| 67  | +      | 39369 | 40427 | 1059      | 352       | 2e-14   | putative tail fiber protein [ <i>Tsukamurella</i> phage TPA2]; gp35 virion protein [ $\phi$ PLPE]                   |
| 71  | +      | 42946 | 43173 | 228       | 75        | 1e-17   | gp36 [ <i>Bdellovibrio</i> phage $\phi$ 1402]                                                                       |
| 72  | +      | 43196 | 43435 | 240       | 79        | 2e-23   | gp37 [ <i>Bdellovibrio</i> phage $\phi$ 1402]                                                                       |
| 76  | +      | 44812 | 45345 | 534       | 177       | 2e-26   | phage-related lysozyme [ <i>Rhizobium</i> sp. NGR234]                                                               |

<sup>a</sup> Generally listed are the closest phage (if any) homologs of identifiable function, followed by identifiable bacterial homologs, and then phage/bacterial hypothetical proteins (if no function could be deduced) from BLASTp searches against the nr (or phage restricted) database using an E-value cutoff of  $<10^{-4}$ . Also included are additional hits/homologs of interest and hits to the Conserved Domain Database (CDD) with their cd/pfam/cl/PHA identifiers. (P/B)CHP = (phage/bacteria) conserved hypothetical protein.
