# Supplementary material for: Phage Morphology Recapitulates Phylogeny: The Comparative Genomics of a New Group of Myoviruses
Source: PubMed Central journal article supplement (PMC3391216; doi:10.1371/journal.pone.0040102), 2012-07-06
Supplement: pone.0040102.s003.pdf [file pone.0040102.s003.pdf]

**Table S3.** *Pectobacterium* phage ZF40 ORFs with identifiable homologs/protein functions.

| ORF | Strand | Start | End   | nt length | aa length | E-value | Homolog(s)/Function <sup>a</sup>                                                             |
|-----|--------|-------|-------|-----------|-----------|---------|----------------------------------------------------------------------------------------------|
| 2   | -      | 567   | 1592  | 1026      | 341       | 3e-101  | Integrase protein [ <i>Salmonella</i> phage ST64B]; many phage integrases                    |
| 3   | -      | 1595  | 1810  | 216       | 71        | 2e-9    | gp29 [ <i>Salmonella</i> phage ST64B]                                                        |
| 4   | -      | 1761  | 1967  | 207       | 68        | 5e-17   | gp12720 [ <i>Yersinia frederiksenii</i> ATCC 33641]                                          |
| 5   | -      | 2014  | 2190  | 177       | 58        | 1e-16   | gp4146 [ <i>Salmonella enterica</i> str. CVM23701]                                           |
| 6   | -      | 2223  | 2738  | 516       | 171       | 2e-23   | gp46 protein [ <i>Listeria</i> phage 2389]; P/BCHP                                           |
| 7   | -      | 2735  | 4900  | 2166      | 721       | 5e-40   | putative exonuclease [ <i>Pseudomonas</i> phage F116]; many exonuclease VIII or RecE         |
| 8   | -      | 4919  | 5407  | 489       | 162       | 2e-13   | gp03953 [ <i>Providencia alcalifaciens</i> DSM 30120]                                        |
| 10  | -      | 6251  | 6994  | 744       | 247       | 1e-44   | cl [Enterobacteria phage P22]; λ cl                                                          |
| 11  | +      | 6987  | 7193  | 207       | 68        | 4e-16   | cro [Enterobacteria phage CUS-3]; λ cro                                                      |
| 12  | +      | 7249  | 7701  | 453       | 150       | 5e-10   | cII [Enterobacteria phage φ80]; λ cII                                                        |
| 13  | +      | 7715  | 7939  | 225       | 74        | 2e-36   | gp12630 [ <i>Yersinia frederiksenii</i> ATCC 33641]; possible adenylosuccinate synthase      |
| 14  | +      | 7957  | 8712  | 756       | 251       | 5e-46   | replication protein [ <i>Aggregatibacter</i> phage S1249]; many replication proteins         |
| 15  | +      | 8702  | 10114 | 1413      | 470       | 2e-149  | phage HK022 P protein [Enterobacteria phage VT2-Sakai]; many DnaB helicases                  |
| 16  | +      | 10157 | 10636 | 480       | 159       | 5e-24   | gp42700 [ <i>Yersinia frederiksenii</i> ATCC 33641]                                          |
| 17  | +      | 10639 | 10893 | 255       | 84        | 8e-20   | gp2823 [ <i>Serratia</i> sp. AS12]                                                           |
| 18  | +      | 10890 | 11726 | 837       | 278       | 3e-10   | gp37 [ <i>Salmonella enterica</i> str. RI_05P066]                                            |
| 19  | +      | 11723 | 11974 | 252       | 83        | 2e-10   | gp49 [Enterobacteria phage Sf6]                                                              |
| 20  | +      | 11971 | 12447 | 477       | 158       | 1e-61   | methyltransferase [ <i>Listeria</i> phage A118]; many DNA N-4 cytosine methyltransferases    |
| 21  | +      | 12444 | 14597 | 2154      | 717       | 4e-122  | methyltransferase [ <i>Pseudomonas</i> phage F116]; many DNA C-5 cytosine methyltransferases |
| 22  | +      | 14594 | 14941 | 348       | 115       | 2e-45   | gp55 [Enterobacteria phage phiV10]; P/BCHP                                                   |
| 23  | +      | 15098 | 15691 | 594       | 197       | 7e-77   | PCHP [Enterobacteria prophage Gifsy-1]                                                       |
| 24  | +      | 15688 | 15972 | 285       | 94        | 2e-46   | gp136 [Enterobacteria phage ST64T]; P/BCHP                                                   |
| 25  | +      | 16004 | 16609 | 606       | 201       | 2e-65   | gp49 [ <i>Salmonella</i> phage ST64B]                                                        |
| 27  | +      | 17021 | 18055 | 1035      | 344       | 4e-97   | Dam [Enterobacteria phage P7]                                                                |
| 28  | -      | 18109 | 18804 | 696       | 231       | 5e-57   | integrase [Enterobacteria phage 21]; λ int                                                   |
| 30  | -      | 19220 | 19570 | 351       | 116       | 1e-27   | gp0840 [ <i>Photobacterium profundum</i> SS9]; BCHP                                          |
| 33  | +      | 20000 | 20212 | 213       | 70        | 2e-31   | lysis protein [Enterobacteria phage cdtI]; λ lysis protein S                                 |
| 34  | +      | 20212 | 20742 | 531       | 176       | 5e-107  | lysis protein [ <i>Yersinia</i> phage PY54]; gp15 putative lysozyme [φPLPE]                  |
| 35  | +      | 20739 | 21263 | 525       | 174       | 4e-52   | gp4986 [ <i>Rahnella</i> sp. Y9602]; BCHP                                                    |
| 36  | +      | 21333 | 21740 | 408       | 135       | 9e-32   | gp66 [ <i>Burkholderia</i> phage φ1026b]; P/BCHP                                             |
| 37  | +      | 21812 | 22066 | 255       | 84        | 1e-32   | Hot [Enterobacteria phage P1]; DNA pol II or III                                             |
| 38  | +      | 22120 | 22341 | 222       | 73        | 3e-10   | Methyl-accepting chemotaxis protein [ <i>Yersinia frederiksenii</i> ATCC 33641]              |

|    |   |       |       |      |     |        |                                                                                           |
|----|---|-------|-------|------|-----|--------|-------------------------------------------------------------------------------------------|
| 39 | + | 22509 | 23186 | 678  | 225 | 6e-109 | putative transposase [ <i>Cronobacter</i> phage ENT47670]; many transposases and P/BCHP   |
| 40 | + | 23219 | 23704 | 486  | 161 | 2e-66  | gp30 [ <i>Cronobacter</i> phage ENT47670]; PCHP                                           |
| 41 | + | 23938 | 25581 | 1644 | 547 | 1e-149 | TerL [ <i>Erwinia</i> phage $\phi$ Et88]                                                  |
| 42 | + | 25581 | 26975 | 1395 | 464 | 3e-134 | gp19 putative portal protein [ $\phi$ PLPE]                                               |
| 43 | + | 27025 | 27774 | 750  | 249 | 6e-26  | head protein [ <i>Yersinia</i> phage PY100]; gp25 putative head protein [ $\phi$ PLPE]    |
| 44 | + | 27784 | 28971 | 1188 | 395 | 2e-84  | gp27 putative head protein [ $\phi$ PLPE]                                                 |
| 45 | + | 28971 | 29486 | 516  | 171 | 3e-67  | gp2221 [ <i>Yersinia pseudotuberculosis</i> IP 31758]                                     |
| 46 | + | 29502 | 30437 | 936  | 311 | 3e-18  | gp29 major capsid protein [ $\phi$ PLPE]                                                  |
| 47 | + | 30427 | 30975 | 549  | 182 | 3e-22  | gp43060 [ <i>Yersinia frederiksenii</i> ATCC 33641]                                       |
| 48 | + | 31005 | 31427 | 423  | 140 | 1e-21  | gp41 [ $\phi$ PLPE]; PCHP                                                                 |
| 49 | + | 31424 | 31891 | 468  | 155 | 3e-15  | gp07 [Deep-sea thermophilic phage D6E]; gp42 [ $\phi$ PLPE]; PCHP                         |
| 50 | + | 31894 | 32316 | 423  | 140 | 1e-10  | gp43 [ $\phi$ PLPE]                                                                       |
| 51 | + | 32316 | 32840 | 525  | 174 | 9e-10  | gp44 [ $\phi$ PLPE]                                                                       |
| 52 | + | 32849 | 34003 | 1155 | 384 | 6e-61  | gp46 [ $\phi$ PLPE]                                                                       |
| 53 | + | 34009 | 34413 | 405  | 134 | 3e-18  | gp47 [ $\phi$ PLPE]                                                                       |
| 54 | + | 34413 | 34814 | 402  | 133 | 6e-53  | gp43000 [ <i>Yersinia frederiksenii</i> ATCC 33641]                                       |
| 55 | + | 34883 | 34984 | 102  | 33  | 2e-10  | gp2215 [ <i>Yersinia pseudotuberculosis</i> IP 31758]                                     |
| 57 | + | 36100 | 37860 | 1761 | 586 | 7e-22  | putative muramidase [ <i>Aeromonas</i> phage PAS-1]; C-term lysozyme, N-term tape measure |
| 58 | + | 37863 | 38507 | 645  | 214 | 7e-17  | gp56 [ $\phi$ PLPE]                                                                       |
| 59 | + | 38504 | 38794 | 291  | 96  | 4e-8   | gp57 [ $\phi$ PLPE]                                                                       |
| 60 | + | 38787 | 39674 | 888  | 295 | 7e-15  | gp58 [ $\phi$ PLPE]; PCHP                                                                 |
| 61 | + | 39674 | 40330 | 657  | 218 | 9e-26  | gp59 putative baseplate protein [ $\phi$ PLPE]                                            |
| 62 | + | 40388 | 40738 | 351  | 116 | 5e-22  | gp60 [ $\phi$ PLPE]; PCHP                                                                 |
| 63 | + | 40738 | 41940 | 1203 | 400 | 6e-69  | gp61 putative baseplate protein [ $\phi$ PLPE]                                            |
| 64 | + | 41933 | 42808 | 876  | 291 | 6e-23  | gp62 [ $\phi$ PLPE]; PCHP                                                                 |
| 65 | + | 42843 | 45332 | 2490 | 829 | 8e-14  | gp173 [ <i>Bathycoccus</i> sp. RCC1105 virus BpV2]; many P/B fiber proteins               |
| 66 | + | 45348 | 45845 | 498  | 165 | 1e-8   | gp51 [ <i>Azospirillum</i> phage Cd]                                                      |
| 67 | + | 45906 | 47873 | 1968 | 655 | 8e-39  | gp05 H [ <i>Burkholderia</i> phage BcepB1A]; many P/B tail fibers                         |

<sup>a</sup> Generally listed are the closest phage (if any) homologs of identifiable function, followed by identifiable bacterial homologs, and then phage/bacterial hypothetical proteins (if no function could be deduced) from BLASTp searches against the nr (or phage restricted) database using an *E*-value cutoff of  $<10^{-4}$ . Also included are additional hits/homologs of interest and hits to the Conserved Domain Database (CDD) with their cd/pfam/cl/PHA identifiers. (P/B)CHP = (phage/bacteria) conserved hypothetical protein.
