# Supplementary material for: Phage Morphology Recapitulates Phylogeny: The Comparative Genomics of a New Group of Myoviruses
Source: PubMed Central journal article supplement (PMC3391216; doi:10.1371/journal.pone.0040102), 2012-07-06
Supplement: pone.0040102.s004.pdf [file pone.0040102.s004.pdf]

**Table S4.** *Vibrio* phage CP-T1 ORFs with identifiable homologs/protein functions.

| ORF | Strand | Start | End   | nt length | aa length | E-value | Homolog(s)/Function <sup>a</sup>                                                           |
|-----|--------|-------|-------|-----------|-----------|---------|--------------------------------------------------------------------------------------------|
| 2   | -      | 189   | 722   | 534       | 177       | 9e-55   | putative exodeoxyribonuclease VIII [ <i>Salmonella</i> phage epsilon34]; PHA02570 DexA     |
| 3   | -      | 727   | 3063  | 2337      | 778       | 6e-46   | DNA polymerase [ <i>Burkholderia</i> phage BcepGomr]; cd05538 phage DNA PolB               |
| 4   | -      | 3060  | 3368  | 309       | 102       | 3e-8    | gp12 [Enterobacteria phage N4]                                                             |
| 5   | -      | 3424  | 4308  | 885       | 294       | 2e-151  | gp68 [ <i>Burkholderia</i> phage BcepB1A]                                                  |
| 7   | -      | 4530  | 5711  | 1182      | 393       | 9e-34   | gp67 [ <i>Burkholderia</i> phage BcepB1A]; pfam10926 PCHP                                  |
| 10  | +      | 6842  | 9823  | 2982      | 993       | 3e84    | gp65 [ <i>Burkholderia</i> phage BcepB1A]; COG1061 helicase                                |
| 11  | +      | 9793  | 10323 | 531       | 176       | 5e-38   | gp62 [ <i>Burkholderia</i> phage BcepB1A]                                                  |
| 12  | +      | 10320 | 11621 | 1302      | 433       | 8e-114  | Dmt [Enterobacteria phage P1]; cd00315 DNA methylase                                       |
| 13  | +      | 11618 | 12319 | 702       | 233       | 3e-96   | adenine-specific DNA methyltransferase [ <i>Pseudoalteromonas</i> phage H105/1]; pfam01555 |
| 14  | +      | 12368 | 12673 | 306       | 101       | 1e-10   | gp14 [φPLPE]; putative TetR family transcriptional regulator                               |
| 17  | +      | 13628 | 13831 | 204       | 67        | 7e-7    | gp0660 [ <i>Thiomicrospira crunogena</i> XCL-2]                                            |
| 20  | +      | 14453 | 16933 | 2481      | 826       | 2e-40   | gp49 primase [ <i>Burkholderia</i> phage BcepB1A]                                          |
| 22  | +      | 17808 | 18491 | 684       | 227       | 2e-19   | TerS [φPLPE]                                                                               |
| 23  | +      | 18481 | 19941 | 1461      | 486       | 0       | TerL [φPLPE]                                                                               |
| 25  | +      | 20113 | 21582 | 1470      | 489       | 0       | gp19 putative portal protein [φPLPE]                                                       |
| 26  | -      | 21620 | 21802 | 183       | 60        | 2e-29   | gp1938 [ <i>Vibrio cholerae</i> 1587]                                                      |
| 29  | -      | 22495 | 22776 | 282       | 93        | 3e-42   | gp226 [ <i>Vibrio</i> phage ICP1]                                                          |
| 33  | +      | 23379 | 24200 | 822       | 273       | 7e-89   | gp25 putative head protein [φPLPE]                                                         |
| 35  | -      | 24489 | 24992 | 504       | 167       | 4e-30   | putative helicase [ <i>Vibrio</i> phage VP16T]; COG1896 predicted hydrolase                |
| 37  | -      | 25188 | 25496 | 309       | 102       | 3e-5    | gp14 [φPLPE]                                                                               |
| 39  | +      | 25855 | 26994 | 1140      | 379       | 1e-72   | gp27 putative head protein [φPLPE]                                                         |
| 40  | +      | 26976 | 27500 | 525       | 174       | 2e-18   | gp28 [φPLPE]; P/BCHP                                                                       |
| 41  | +      | 27506 | 28519 | 1014      | 337       | 4e-96   | gp29 major capsid protein [φPLPE]                                                          |
| 42  | +      | 28532 | 28963 | 432       | 143       | 4e-6    | gp30 [φPLPE]                                                                               |
| 44  | +      | 29648 | 30073 | 426       | 141       | 6e-34   | gp41 [φPLPE]; P/BCHP                                                                       |
| 47  | +      | 30680 | 31150 | 471       | 156       | 2e-25   | gp42 [φPLPE]; P/BCHP                                                                       |
| 48  | +      | 31151 | 31531 | 381       | 126       | 5e-30   | gp43 [φPLPE]                                                                               |
| 49  | +      | 31528 | 32064 | 537       | 178       | 2e-50   | gp44 [φPLPE]                                                                               |
| 50  | +      | 32097 | 33242 | 1146      | 381       | 2e-166  | gp46 [φPLPE]; P/BCHP                                                                       |
| 51  | +      | 33256 | 33669 | 414       | 137       | 4e-56   | gp47 [φPLPE]                                                                               |
| 54  | +      | 34126 | 34539 | 414       | 137       | 2e-9    | gp48 [φPLPE]                                                                               |
| 55  | +      | 34584 | 34706 | 123       | 40        | 1e-8    | gp49 [φPLPE]                                                                               |
| 56  | +      | 34708 | 36072 | 1365      | 454       | 3e-53   | gp55 putative tail-fiber/lysozyme protein [φPLPE]                                          |

|    |   |       |       |      |     |        |                                                                          |
|----|---|-------|-------|------|-----|--------|--------------------------------------------------------------------------|
| 57 | + | 36082 | 36729 | 648  | 215 | 2e-72  | gp56 [ϕPLPE]; P/BCHP                                                     |
| 58 | + | 36726 | 37034 | 309  | 102 | 2e-25  | gp57 [ϕPLPE]                                                             |
| 59 | + | 37027 | 37881 | 855  | 284 | 8e-88  | gp58 [ϕPLPE]; P/BCHP                                                     |
| 60 | + | 38207 | 38905 | 699  | 232 | 3e-95  | gp59 putative baseplate protein [ϕPLPE]                                  |
| 61 | + | 38902 | 39252 | 351  | 116 | 6e-49  | gp60 [ϕPLPE]; P/BCHP                                                     |
| 62 | + | 39245 | 40468 | 1224 | 407 | 8e-151 | gp61 putative baseplate protein [ϕPLPE]                                  |
| 63 | + | 40465 | 41106 | 642  | 213 | 4e-44  | gp62 [ϕPLPE]; P/BCHP                                                     |
| 64 | + | 41110 | 42141 | 1032 | 343 | 3e-175 | gp70 [ <i>Vibrio</i> phage ICP1]; gp63 tail-fiber protein [ϕPLPE]        |
| 65 | + | 42143 | 42544 | 402  | 133 | 3e-39  | gp00325 [ <i>Vibrio</i> phage ICP1_2004_A]                               |
| 67 | + | 42742 | 43278 | 537  | 178 | 3e-70  | gp26T [ <i>Vibrio</i> phage VP16T]; putative secretion activator protein |
| 68 | + | 43278 | 43787 | 510  | 169 | 4e-8   | gp0023 [ <i>Thalassomonas</i> phage BA3]                                 |
| 69 | + | 43784 | 44212 | 429  | 142 | 3e-6   | gp67 [ϕPLPE]                                                             |
| 70 | + | 44215 | 44478 | 264  | 87  | 7e-12  | gp68 [ϕPLPE]                                                             |

<sup>a</sup>Generally listed are the closest phage (if any) homologs of identifiable function, followed by identifiable bacterial homologs, and then phage/bacterial hypothetical proteins (if no function could be deduced) from BLASTp searches against the nr (or phage restricted) database using an *E*-value cutoff of  $<10^{-4}$ . Also included are additional hits/homologs of interest and hits to the Conserved Domain Database (CDD) with their cd/pfam/cl/PHA identifiers. (P/B)CHP = (phage/bacteria) conserved hypothetical protein.
