# Supplementary material for: Phage Morphology Recapitulates Phylogeny: The Comparative Genomics of a New Group of Myoviruses
Source: PubMed Central journal article supplement (PMC3391216; doi:10.1371/journal.pone.0040102), 2012-07-06
Supplement: pone.0040102.s005.pdf [file pone.0040102.s005.pdf]

**Table S5.** *Vibrio* phage 138 ORFs with identifiable homologs/protein functions.

| ORF | Strand | Start | End   | nt length | aa length | E-value | Homolog(s)/Function <sup>a</sup>                                                           |
|-----|--------|-------|-------|-----------|-----------|---------|--------------------------------------------------------------------------------------------|
| 1   | -      | 1     | 534   | 534       | 177       | 2e-57   | putative exodeoxyribonuclease VIII [ <i>Salmonella</i> phage epsilon34]; PHA02570 DexA     |
| 2   | -      | 539   | 2815  | 2277      | 758       | 3e-49   | DNA polymerase [ <i>Burkholderia</i> phage BcepGomr]; cd05538 phage DNA PolB               |
| 3   | -      | 2840  | 3724  | 885       | 294       | 2e-19   | gp68 [ <i>Burkholderia</i> phage BcepB1A]                                                  |
| 5   | -      | 3946  | 5127  | 1182      | 393       | 3e-36   | gp67 [ <i>Burkholderia</i> phage BcepB1A]; pfam10926 PCHP                                  |
| 6   | -      | 5106  | 5930  | 825       | 274       | 6e-9    | gp66 [ <i>Burkholderia</i> phage BcepB1A]                                                  |
| 9   | +      | 6513  | 8435  | 1923      | 640       | 4e-112  | putative helicase [ <i>Vibrio</i> phage VP16T]; COG1896 predicted hydrolase                |
| 10  | +      | 8466  | 9449  | 984       | 327       | 9e-42   | NinC protein [Enterobacteria phage lambda]                                                 |
| 11  | +      | 9442  | 9924  | 483       | 160       | 1e-41   | gp62 [ <i>Burkholderia</i> phage BcepB1A]                                                  |
| 12  | +      | 9921  | 11204 | 1284      | 427       | 2e-107  | Dmt [Enterobacteria phage P1]; cd00315 DNA methylase                                       |
| 13  | +      | 11201 | 11902 | 702       | 233       | 2e-99   | adenine-specific DNA methyltransferase [ <i>Pseudoalteromonas</i> phage H105/1]; pfam01555 |
| 14  | +      | 11942 | 12256 | 315       | 104       | 8e-9    | gp14 [φPLPE]; putative TetR family transcriptional regulator; pfam00440                    |
| 17  | +      | 12721 | 12924 | 204       | 67        | 6e-10   | gp0660 [ <i>Thiomicrospira crunogena</i> XCL-2]                                            |
| 19  | +      | 13546 | 16026 | 2481      | 826       | 2e-43   | gp49 primase [ <i>Burkholderia</i> phage BcepB1A]                                          |
| 21  | +      | 16879 | 17526 | 648       | 215       | 5e-21   | TerS [φPLPE]                                                                               |
| 22  | +      | 17507 | 18895 | 1389      | 462       | 2e-123  | TerL [ <i>Burkholderia ambifaria</i> phage BcepF1]                                         |
| 23  | +      | 18899 | 20368 | 1470      | 489       | 0       | gp19 putative portal protein [φPLPE]                                                       |
| 28  | +      | 21425 | 22246 | 822       | 273       | 2e-93   | gp25 putative head protein [φPLPE]                                                         |
| 30  | -      | 22535 | 23038 | 504       | 167       | 2e-33   | putative helicase [ <i>Vibrio</i> phage VP16T]; COG1896 predicted hydrolase                |
| 32  | -      | 23524 | 23853 | 330       | 109       | 2e-5    | gp26 [φPLPE]                                                                               |
| 33  | +      | 23852 | 25102 | 1251      | 416       | 2e-77   | gp27 putative head protein [φPLPE]                                                         |
| 34  | +      | 25084 | 25608 | 525       | 174       | 2e-22   | gp28 [φPLPE]; P/BCHP                                                                       |
| 35  | +      | 25614 | 26627 | 1014      | 337       | 1e-99   | gp29 major capsid protein [φPLPE]                                                          |
| 36  | -      | 26665 | 27369 | 705       | 234       | 8e-22   | gp100 [ <i>Rhizobium</i> phage 16-3]; P/BCHP                                               |
| 38  | +      | 27540 | 27863 | 324       | 107       | 3e-6    | gp30 [φPLPE]                                                                               |
| 40  | +      | 28548 | 28973 | 426       | 141       | 1e-35   | gp41 [φPLPE]; P/BCHP                                                                       |
| 43  | -      | 29684 | 30022 | 339       | 112       | 5e-41   | gp0180 [ <i>Vibrio</i> phage KVP40]                                                        |
| 44  | +      | 30102 | 30572 | 471       | 156       | 9e-29   | gp42 [φPLPE]; P/BCHP                                                                       |
| 45  | +      | 30573 | 30953 | 381       | 126       | 8e-34   | gp43 [φPLPE]                                                                               |
| 46  | +      | 30950 | 31486 | 537       | 178       | 6e-52   | gp44 [φPLPE]                                                                               |
| 47  | +      | 31519 | 32664 | 1146      | 381       | 2e-170  | gp46 [φPLPE]; P/BCHP                                                                       |
| 48  | +      | 32678 | 33091 | 414       | 137       | 2e-59   | gp47 [φPLPE]                                                                               |
| 51  | -      | 33459 | 34070 | 612       | 203       | 1e-19   | gpHK24401 [Enterobacteria phage HK244]; P/BCHP                                             |
| 52  | +      | 34152 | 34565 | 414       | 137       | 1e-13   | gp48 [φPLPE]                                                                               |
| 53  | +      | 34610 | 34732 | 123       | 40        | 1e-8    | gp49 [φPLPE]                                                                               |

|    |   |       |       |      |     |        |                                                                  |
|----|---|-------|-------|------|-----|--------|------------------------------------------------------------------|
| 54 | + | 34734 | 36098 | 1365 | 454 | 5e-57  | gp55 putative tail-fiber/lysozyme protein [ $\phi$ PLPE]         |
| 55 | + | 36108 | 36755 | 648  | 215 | 5e-76  | gp56 [ $\phi$ PLPE]; P/BCHP                                      |
| 56 | + | 36752 | 37060 | 309  | 102 | 2e-29  | gp57 [ $\phi$ PLPE]                                              |
| 57 | + | 37053 | 37907 | 855  | 284 | 2e-91  | gp58 [ $\phi$ PLPE]; P/BCHP                                      |
| 58 | + | 38233 | 38931 | 699  | 232 | 1e-98  | gp59 putative baseplate protein [ $\phi$ PLPE]                   |
| 59 | + | 38928 | 39278 | 351  | 116 | 5e-53  | gp60 [ $\phi$ PLPE]; P/BCHP                                      |
| 60 | + | 39271 | 40494 | 1224 | 407 | 2e-154 | gp61 putative baseplate protein [ $\phi$ PLPE]                   |
| 61 | + | 40491 | 41132 | 642  | 213 | 2e-48  | gp62 [ $\phi$ PLPE]; P/BCHP                                      |
| 62 | + | 41136 | 42389 | 1254 | 417 | 0      | gp35 [ <i>Vibrio</i> phage Ch457]; many tail fibers              |
| 63 | + | 42389 | 42916 | 528  | 175 | 9e-48  | putative tail fiber assembly protein [ <i>Vibrio</i> phage K139] |
| 65 | + | 43135 | 43599 | 465  | 154 | 2e-34  | putative phage lysozyme [ <i>Listonella</i> phage phiHSIC]       |
| 66 | + | 43596 | 44105 | 510  | 169 | 3e-11  | gp0023 [ <i>Thalassomonas</i> phage BA3]                         |

<sup>a</sup>Generally listed are the closest phage (if any) homologs of identifiable function, followed by identifiable bacterial homologs, and then phage/bacterial hypothetical proteins (if no function could be deduced) from BLASTp searches against the nr (or phage restricted) database using an *E*-value cutoff of  $<10^{-4}$ . Also included are additional hits/homologs of interest and hits to the Conserved Domain Database (CDD) with their cd/pfam/cl/PHA identifiers. (P/B)CHP = (phage/bacteria) conserved hypothetical protein.
